# Supplementary material
Source: publisher site journal article supplement (https://www.dovepress.com/get_supplementary_file.php?f=491175.docx)
Supplement: Supplementary file 1 [file get_supplementary_file.php]

**Quercetin alleviates diabetic peripheral neuropathy by regulating axon guidance factors and inhibiting the Rho/ROCK pathway *in vivo* and *in vitro***

Wei Song1,2,*, Yaoyang Li 1,*, Yifan Jia1, Lingling Xu3, Lin Kang4, Yunshuang Yang5, Shuyu Wang1, Qian Zhang1, and Qunli Wu1

1Department of Traditional Chinese Medicine, Peking Union Medical College Hospital, Peking Union Medical College, Chinese Academy of Medical Sciences, Beijing 100730, China; 2Institute of Clinical Medicine, National Infrastructures for Translational Medicine, Peking Union Medical College Hospital, Chinese Academy of Medical Sciences, Beijing, 100730, China; 3Department of Endocrinology, Peking Union Medical College Hospital, Peking Union Medical College, Chinese Academy of Medical Sciences, Beijing 100730, China; 4Department of Geriatric, Peking Union Medical College Hospital, Peking Union Medical College, Chinese Academy of Medical Sciences, Beijing 100730, China; 5Department of Preventive Medicine, Beijing Longfu Hospital, Beijing 100010, China

*These authors contributed equally to this work

Correspondence: Qian Zhang, Peking Union Medical College Hospital, Chinese Academy of Medical Sciences and Peking Union Medical College, Beijing 100730, China, E-mail zhangqian1@pumch.cn; Qunli Wu, Peking Union Medical College Hospital, Chinese Academy of Medical Sciences and Peking Union Medical College, Beijing 100730, China, E-mail chinlie@163.com.


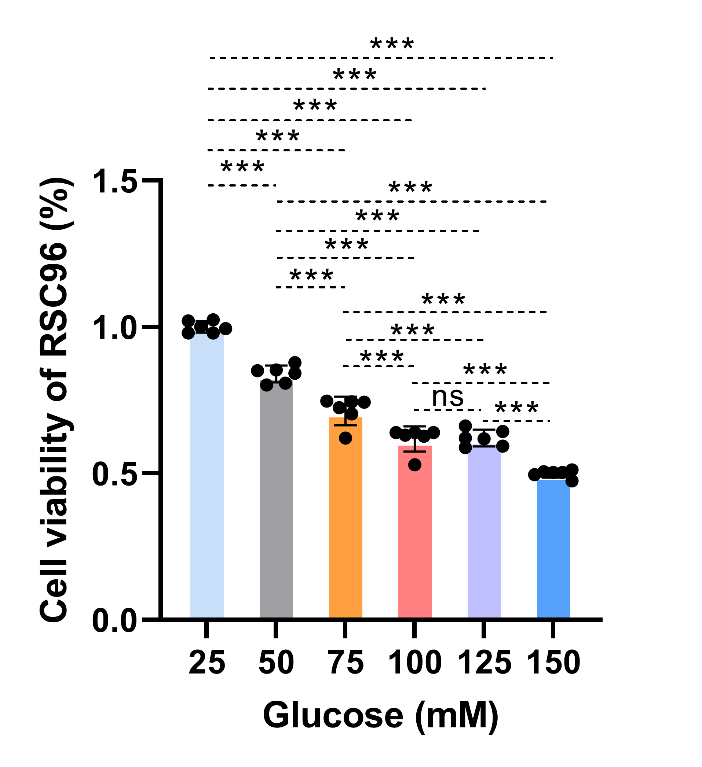


**Figure S1** Cell viability of RSC96 under high-glucose pretreatment duration with different concentrations. The cells were cultured for 72 h before CCK-8 assay. Glucose at 50 mM was chosen for further studies. Data are expressed as mean ± SD (N = 6). ****p* < 0.001; ns, no significance with *p* > 0.05.


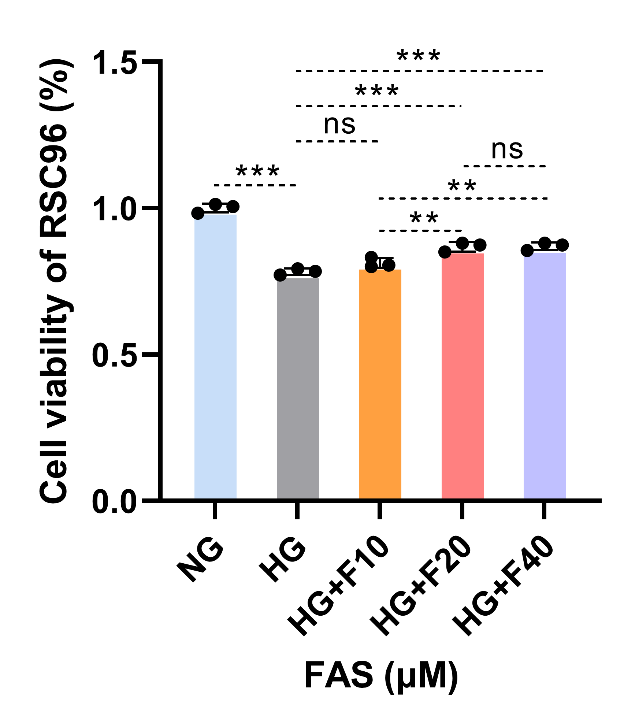


**Figure S2** Effect of fasudil (FAS) at different concentrations on cell viability of high-glucose damaged RSC96 cells. Fasudil at 40 μM was chosen for further studies. NG, normal glucose; HG: high glucose; F10, fasudil at concentration of 10 μmol/L; F20, fasudil at concentration of 20 μmol/L; F40, fasudil at concentration of 40 μmol/L. Data are expressed as mean ± SD (N = 3). ***p* < 0.01; ****p* < 0.001; ns, no significance with *p* > 0.05.


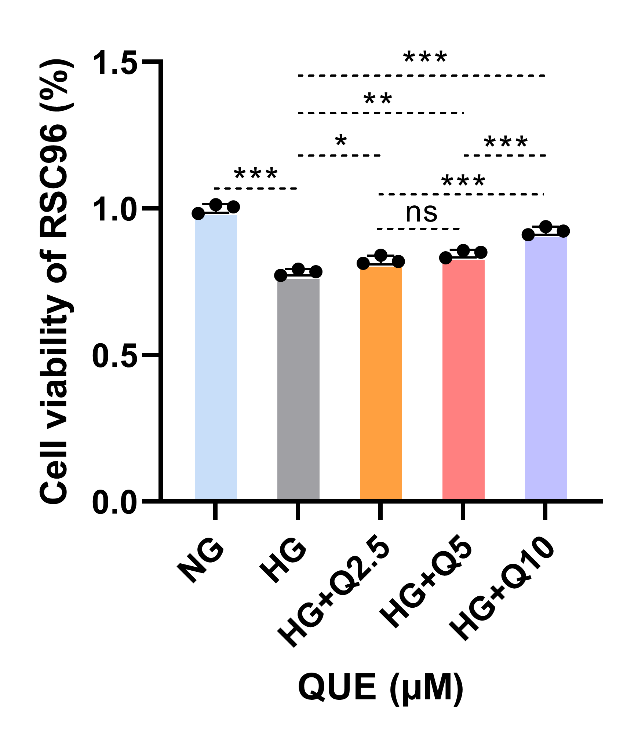


**Figure S3** Effect of quercetin (QUE) at different concentrations on cell viability of high-glucose damaged RSC96 cells. Quercetin at 10 μM was chosen for further studies. NG, normal glucose; HG: high glucose; Q2.5, quercetin at concentration of 2.5 μmol/L; Q5, quercetin at concentration of 5 μmol/L; Q10, quercetin at concentration of 10 μmol/L. Data are expressed as mean ± SD (N = 3). **p* < 0.05; ***p* < 0.01; ****p* < 0.001; ns, no significance with *p* > 0.05.


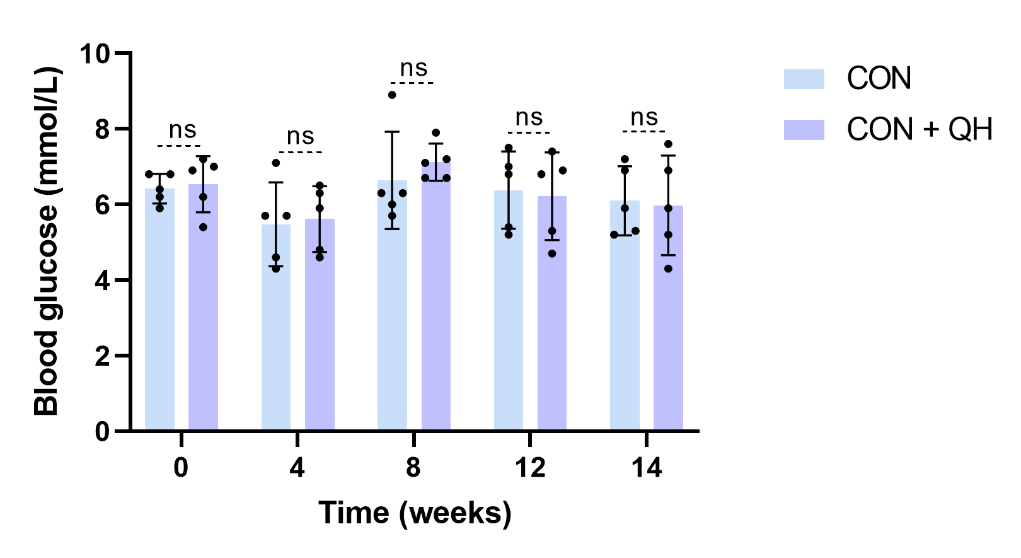


**Figure S4** Effects of quercetin on blood glucose of healthy rats. The blood glucose level of CON and CON+QH group were monitored at 0 w, 4 w, 8 w, 12 w and 14 w, respectively. Data are expressed as mean ± SD. ns, no significant difference. CON, control; QH, quercetin at 60 mg/kg.
